# Supplementary material
Source: publisher figshare collection journal article supplement (https://frontiersin.figshare.com/ndownloader/files/24778661)
Supplement: Supplementary file [file 24778661]

Table S2. Neuropathologic, demographic and RNA QC characteristics of the groups for Nanostring gene expression analysis.

|                           | CNT (N=17)      | sAD (N=15)    | TREM2 R47H AD (N=8) | PLOSL (N=4)   |
|---------------------------|-----------------|---------------|---------------------|---------------|
| Braak: AVE (min-max)      | 1.8 (0-3)       | 5.7 (5-6)     | 5.5 (5-6)           | NA            |
| CERAD: AVE (min-max)      | 0.4 (0-2)       | 2.8 (2-3)     | 2.3 (1-3)           | NA            |
| AGE, years: Ave (min-max) | 79 (56-94)      | 74 (62-96)    | 74 (64-89)          | 42 (38-48)    |
| Gender: males, %          | 29,4%           | 27%           | 25%                 | 75%           |
| PMI, hours: AVE (min-max) | 10 (2.5-22.2)   | 12 (2.5-36)   | 13 (7.6-18)         | ND            |
| RIN: AVE (min-max)        | 2.5 (1.6 - 4.5) | 2.4 (2.1-3.1) | 2.4 (2-2.8)         | 2.4 (2.2-2.6) |

NA – not applicable

ND – not determined
